# Supplementary material for: Structural and biophysical properties of FopA, a major outer membrane protein of Francisella tularensis
Source: PubMed Central journal article supplement (PMC9342783; doi:10.1371/journal.pone.0267370), 2022-08-01
Supplement: pone.0267370.s006.pdf [file pone.0267370.s006.pdf]

**Table S1. Closest FopA homologs identified by BLAST search <sup>a</sup>.**

| <b>Organism</b>                   | <b>NCBI Reference Sequence</b> | <b>Order</b>       | <b>Family</b>         | <b>Query cover<sup>b</sup></b> | <b>E value<sup>c</sup></b> | <b>Identity <sup>d</sup></b> |
|-----------------------------------|--------------------------------|--------------------|-----------------------|--------------------------------|----------------------------|------------------------------|
| <i>Fangia hongkongensis</i>       | WP_018300465.1                 | Thiotrichales      | Fastidiosibacteraceae | 76%                            | 4e-55                      | 39.22%                       |
| <i>Caedibacter taeniospiralis</i> | WP_100550987.1                 | Thiotrichales      | Fastidiosibacteraceae | 82%                            | 5e-52                      | 36.28%                       |
| <i>Fastidiosibacter lacustris</i> | WP_116964154.1                 | Thiotrichales      | Fastidiosibacteraceae | 82%                            | 6e-52                      | 35.98%                       |
| <i>Cysteiniphilum</i> sp. JM-1    | WP_151194100.1                 | Thiotrichales      | Fastidiosibacteraceae | 81%                            | 6e-52                      | 36.89%                       |
| <i>Geobacter bemidjensis</i>      | WP_012529806.1                 | Desulfuromonadales | Geobacteraceae        | 75%                            | 2e-13                      | 25.94%                       |
| <i>Marinagarivorans algicola</i>  | WP_053981259.1                 | Cellvibrionales    | Cellvibrionaceae      | 75%                            | 3e-12                      | 26.28%                       |
| <i>Alishewanella jeotgali</i>     | WP_008951022.1                 | Alteromonadales    | Alteromonadaceae      | 86%                            | 7e-12                      | 26.46%                       |
| <i>Pseudomonas aeruginosa</i>     | WP_134304455.1                 | Pseudomonadales    | Pseudomonadaceae      | 64%                            | 7e-11                      | 28.09%                       |
| <i>Marinomonas piezotolerans</i>  | WP_115468919.1                 | Oceanospirillales  | Oceanospirillaceae    | 67%                            | 1e-09                      | 26.41%                       |

<sup>a</sup> Listed are all of the homologs with at least 25% sequence identity to FopA.

<sup>b</sup> Percentage of query sequence residues that overlap with the reference sequence.

<sup>c</sup> Expect value (E) is a parameter that describes the number of hits one can "expect" to see by chance when searching a database.

<sup>d</sup> Quantitative measurement of the similarity between two sequences.
