# Supplementary material for: Structural and biophysical properties of FopA, a major outer membrane protein of Francisella tularensis
Source: PubMed Central journal article supplement (PMC9342783; doi:10.1371/journal.pone.0267370), 2022-08-01
Supplement: pone.0267370.s007.pdf [file pone.0267370.s007.pdf]

**Table S2. FopA secondary structure estimated by bioinformatics and CD spectroscopy.**

| <b>Analysis method</b>        | <b>Helices (%)</b> | <b>Strands (%)</b> | <b>Turns (%)</b> | <b>Unordered (%)</b> |
|-------------------------------|--------------------|--------------------|------------------|----------------------|
| Phyre <sup>2</sup> prediction | 22                 | 32                 | -                | 30                   |
| CD spectroscopy               | 17.3               | 30.6               | 21.6             | 29.7                 |
