# Supplementary material for: Structural and biophysical properties of FopA, a major outer membrane protein of Francisella tularensis
Source: PubMed Central journal article supplement (PMC9342783; doi:10.1371/journal.pone.0267370), 2022-08-01
Supplement: pone.0267370.s008.pdf [file pone.0267370.s008.pdf]

**Table S3. FopA crystals X-ray diffraction.**

| <b>Data collection and processing statistics</b> |                   |
|--------------------------------------------------|-------------------|
| Beamline                                         | 23-ID-D           |
| Crystal size ( $\mu\text{m}$ )                   | 25 x 25 x 1       |
| Temperature (K)                                  | 100               |
| Wavelength ( $\text{\AA}$ )                      | 1.033             |
| Maximum Resolution observed ( $\text{\AA}$ )     | 5                 |
| Resolution range ( $\text{\AA}$ )                | 42.0-6.5          |
| Space group                                      | H32               |
| Unit cell dimensions                             |                   |
| a, b, c ( $\text{\AA}$ )                         | 48.9, 48.9, 324.5 |
| $\alpha$ , $\beta$ , $\gamma$ ( $^\circ$ )       | 90, 90, 120       |
| Completeness (%)                                 | 98.1              |
| Overall $I/\sigma$                               | 9.04              |
| Total number of reflections                      | 10,651            |
| Number of unique reflections                     | 663               |
