# Supplementary material for: Structural and biophysical properties of FopA, a major outer membrane protein of Francisella tularensis
Source: PubMed Central journal article supplement (PMC9342783; doi:10.1371/journal.pone.0267370), 2022-08-01
Supplement: pone.0267370.s009.pdf [file pone.0267370.s009.pdf]

**S1 File. Expression clone detail. (A) Protein sequence. (B) Plasmid DNA sequence.**

**A**

```

LOCUS Translation\of\pRSET-FTT0583-His8 401 aa 25-OCT-2018
SOURCE
ORGANISM
FEATURES             Location/Qualifiers
     Site              394..401
                        /vntifkey="264"
                        /label=His8
     Region            1..393
                        /vntifkey="1000"
                        /label=FopA\full-length
     Region            1..23
                        /vntifkey="200"
                        /label=signal\sequence
ORIGIN
1  mmrlksivia ttvllgsata siaagsdnid tlantnsatt qssgfaannf iapfantysa
61 ltnkndtwgp qdrtgqwylg vdanglagtp nspsgaganf tigyninkyf avqynqlvgr
121 vfaglgegvv nfsnntmftp yaaggagwan lagqatgawd vgggllkfels rnvqasvdyr
181 yiqtmapsni sgangragtn migagltwff ggkdttnndt gniqngatt aaqtvampiti
241 deskyvlpag ikqcegnfnl tedgvacyti ngddvtvylt tkfaydkatl nakgkkaias
301 fvnfikdsni ssvtkgyas qggtgsefdi ynqklsekra qavadymkql gldsekiitk
361 gfgyndtlgg ihksdprnqr veasvsaplk eanhhhhhhh h
//

```

**B**

```

LOCUS pRSET-FTT0583-His8 3995 bp DNA circular 9-OCT-2018
SOURCE
ORGANISM
FEATURES             Location/Qualifiers
     promoter          20..39
                        /vntifkey="30"
                        /label=T7\promoter
     rep_origin         1554..2009
                        /vntifkey="33"
                        /label=f1\ori
     CDS                2140..3000
                        /vntifkey="4"
                        /label=AMP-R
     promoter          2041..2139
                        /vntifkey="30"
                        /label=bla\pr
     rep_origin         3145..3818
                        /vntifkey="33"
                        /label=pUC\ori
     RBS                85..92
                        /vntifkey="32"
                        /label=RBS
     terminator         1354..1483
                        /vntifkey="43"
                        /label=T7\term
     CDS                1279..1302
                        /vntifkey="4"
                        /label=His8
     CDS                100..1278
                        /vntifkey="4"
                        /label=FopA
BASE COUNT 1069 a 890 c 949 g 1087 t
ORIGIN
1  gatctcgatc ccgcgaaatt aatacagactc actataggga gaccacaacg gtttccctct
61 agaaataatt ttgtttaact ttaagaagga gatatacat t gatgagatt aaaaagtatt
121 gttatagcta caactgtatt attaggttca gctacagcat ctatcgctgc aggttcagat
181 aatatogata cattagcaaa cactaatca gctactacac aaagcagtg ttttcagct
241 aataatttca ttgctcctt tgcaaaact tatagcgct tgactaaaca ggacaatact
301 tggggtcctc aagatagaac tggccagtgg tacttaggtg tagatgctaa cggctagct
361 ggaactccta actctccatc aggtgctggt gctaacttca caatcggtta taacatcaat
421 aaactctteg ctgtacagta caaccaatta gttggtagag tatttgctgg tttagtgtaa
481 ggtgttgtaa actttagtaa taatactatg ttactccat atgctgcagg tggctgctgt
541 tgggcaaatc tagcagtgca agcaacaggt gottgggatg tgggtggtgg tcttaagttt
601 gaactatcta gaaatgttca agcaagtgtt gactacagat atatccaac aatggcacct
661 agtaatatatt ctggtgctaa tggcagagcg ggtactaaca tgattggtgc tggtttaaca
721 tggttccttg gtggcaaaaga tactactaat aatgacactg gtaatatcoa ggaataatggt
781 gcgactacag ctgctcaaac tgttgctatg ccaactattg atgagtctaa gtagtgttta
841 cctgctgcta ttaagcaatg tgaaggcaac ttaactctaa ctgaagatgg tgtcgctgct
901 tatacaataa atggtgatga tgtaacagtt taactagata ctaagtttgc ttatgatataa
961 gctactttaa atgctaaagg taaaaagct attgcatctt ttgttaattt tatcaaggat
1021 agtaacatta gctctgtaac agttaaggt tatgcttcto aaggtcaaac tggtagcgag

```

1081 **tttgatat** **ataccaaaa** **actttctgag** **aagagagcac** **aagctgttgc** **tgattacatg**  
1141 **aagcaattag** **gtttagatag** **tgagaaaata** **attactaaag** **gttttgcta** **taatgatact**  
1201 **ttaggtggta** **ttcataagtc** **tgatccgcgt** **aaccagcgtg** **tagaagctag** **cgatcagct**  
1261 **ccacttaaag** **aagctaacca** **ccatcatcac** **caccatcacc** **at**taatagaa gggcgaattc  
1321 cagcacactg gggccgcta ctagtggatc cggctgctaa caaagcccga aaggaagctg  
1381 agttggctgc tggcaccgct gagcaataac tagcataacc ccttggggcc tctaaacggg  
1441 tcttgagggg ttttttgcctg aaaggaggaa ctatatccgg atctggcgta atagcgaaga  
1501 ggcccgcacc gatcgccctt cccaacagtt gcgcagcctg aatggcgaat gggacgcgcc  
1561 ctgtagcggc gcattaagcg cggcgggtgt ggtggttacg cgcagcgtga ccgctacact  
1621 tggcagcgcc cttagcggccg ctctcttctgc tttcttccct tcttctctcg ccacgttctgc  
1681 cggctttccc cgtaagctc taaatcgggg gctcccttta gggttccgat ttagtgcttt  
1741 acggcacctc gaccccaaaa aacttgatta gggatgaggt tcacgtagtg ggccatcgcc  
1801 ctgatagacg gtttttgcctt ctttgacggt ggagtcaccg tctttaaata gtggactcct  
1861 gttccaaact ggaaccaaac tcaaccctat ctcggtctat tcttttgatt tataagggat  
1921 tttgocgatt tggccctatt ggttaaaaa tgagctgatt taacaaaaat ttaacgcgaa  
1981 ttttaacaaa atattaaacg ttacaattta ggtggcactt ttcggggaaa tgtgcgcgga  
2041 acccttattt gtttattttt ctaaatacat tcaaatatgt atccgctcat gagacaataa  
2101 ccttgataaa tgcttcaata atattgaaaa aggaagagta tgagtattca acatttccgt  
2161 gtogccctta tccctttttt tgcggcattt tgccttccgt tttttgctca cccagaacg  
2221 ctgggtgaaag taaaagatgc tgaagatcag ttgggtgcac gagtggggtta catcgaactg  
2281 gatctcaaca gcggtgaagt ccttgagagt tttcgcctcg aagaacgctt tccaatgatg  
2341 agcaactttta aagtctctgt atgtggcgcg gtattatccc gtattgacgc cgggcaagag  
2401 caactcggtc gccgcataca ctattctcag aatgacttgg ttgagtactc accagtaca  
2461 gaaaagcatc ttacggatgg catgacagta agagaattat gcagtgtctc cataaccatg  
2521 agtgataaca ctgcccgaaa cttacttctg acaacgatcg gaggaccgaa ggagctaac  
2581 gcttttttgc acaacatggg ggatcatgta actcgccttg atcgttggga accggagctg  
2641 aatgaagcca taccaaaacg cggagctgac accacgatgc ctgtagcaat ggcaacaacg  
2701 ttgcgcaaac tattaactgg cgaactactt actctagctt cccggcaaca attaatagac  
2761 tggatggagg cggataaaagt tgcaggacca cttctgctcct cggcccttcc ggtggctgg  
2821 tttattgctg ataaatctgg agccgggtgag cgtgggtctc gcggtatcat tgcagcactg  
2881 gggccagatg gtaagccctc ccgtatcgtg gttatctaca cgacggggag tcaggcaact  
2941 atggatgaac gaaaatagaca gatcgtgag ataggtgcct cactgattaa gcatttgtaa  
3001 ctgtcagacc aagtttactc atatatactt tagattgatt taaaacttca tttttaattt  
3061 aaaagatctt aggtgaagat cctttttgat aatctcatga ccaaaatccc ttaacgtgag  
3121 ttttctgtcc actgagcgtc agaccccgta gaaaagatca aaggatcttc ttgagatcct  
3181 ttttttctgc gcgtaactct ctgcttgcaa acaaaaaaac caccgctacc agcgggtggt  
3241 tgtttgcccg atcaagagct accaactcct tttccgaagg taactggctt cagcagagcg  
3301 cagataccaa atactgttct tctagtgtag ccgtagttag gccaccactt caagaactct  
3361 gtgacaccgc ctacatacct cgctctgcta atcctgttac cagtggctgc tgcagtggtg  
3421 gataagctgt gtcttaccgg gttggactca agacgatagt taccggataa ggcgcagcgg  
3481 tgggctgtaa cggggggttc gtgcacacag cccagcttgg agcgaacgac ctacaccgaa  
3541 ctgagatacc tacagcgtga gctatgagaa agcggccacg tcccgaagg gagaaaggcg  
3601 gacaggtatc cggtaagcgg cagggtcgga acaggagagc gcacgagggg gcttccaggg  
3661 ggaacgcctt ggtaacttta tagtctgtc gggtttccgc acctctgact tgagcgtoga  
3721 tttttgtgat gctcgtcagg ggggcccggc ctatggaaaa acgccagcaa cgcgctctt  
3781 ttacggttcc tggccttttg ctggcctttt gctcacatgt tcttctctgc gttatccct  
3841 gattctgtgg ataaccgtat taaccgcttt gagtgagctg ataccgctcg ccgcagccga  
3901 acgaccgagc gcagcagctc agtgagcggg gaagcggaaag agcggccaat acgcaaacg  
3961 cctctccccg cgcgttggcc gattcattaa tgcag

//
